# Supplementary material for: Ninjurin 2, a Cell Adhesion Molecule and a Target of p53, Modulates Wild-Type p53 in Growth Suppression and Mutant p53 in Growth Promotion
Source: MDPI journal article supplement (doi:10.3390/cancers16010229), 2024-01-04

**File S1.** The original western blot figures.

Fig.1A

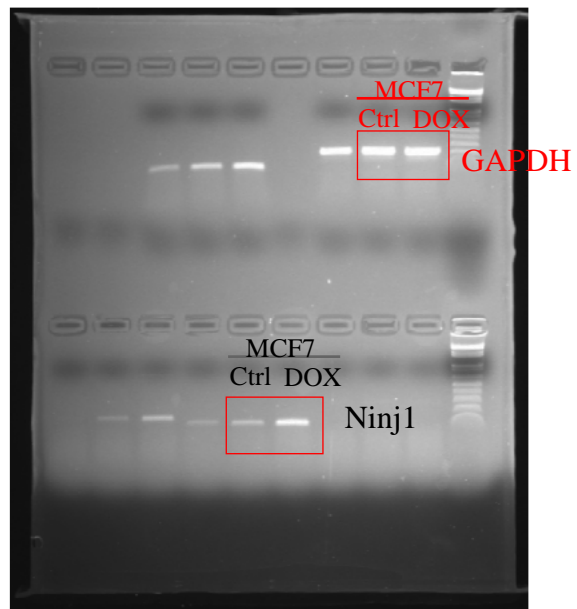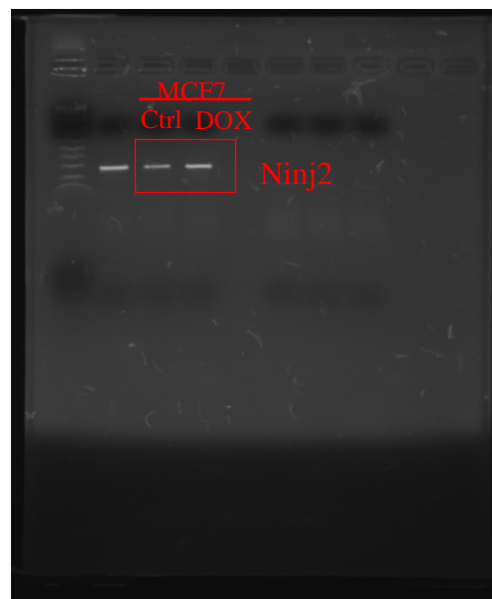

Fig1B

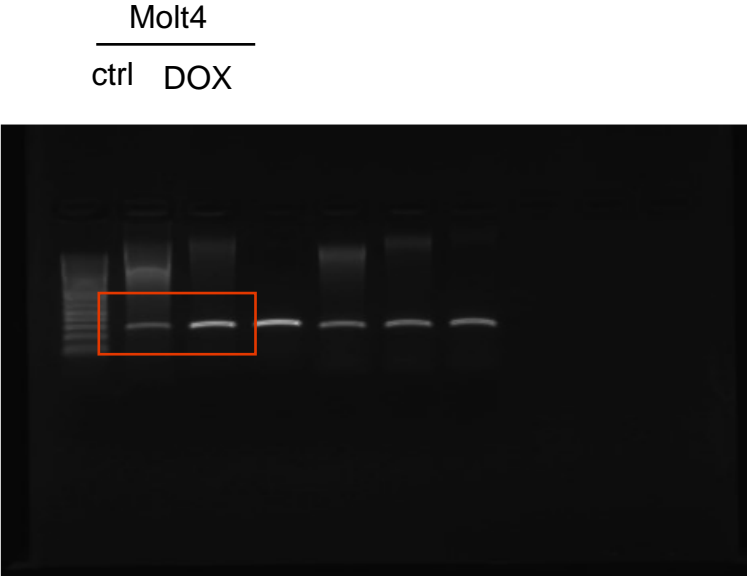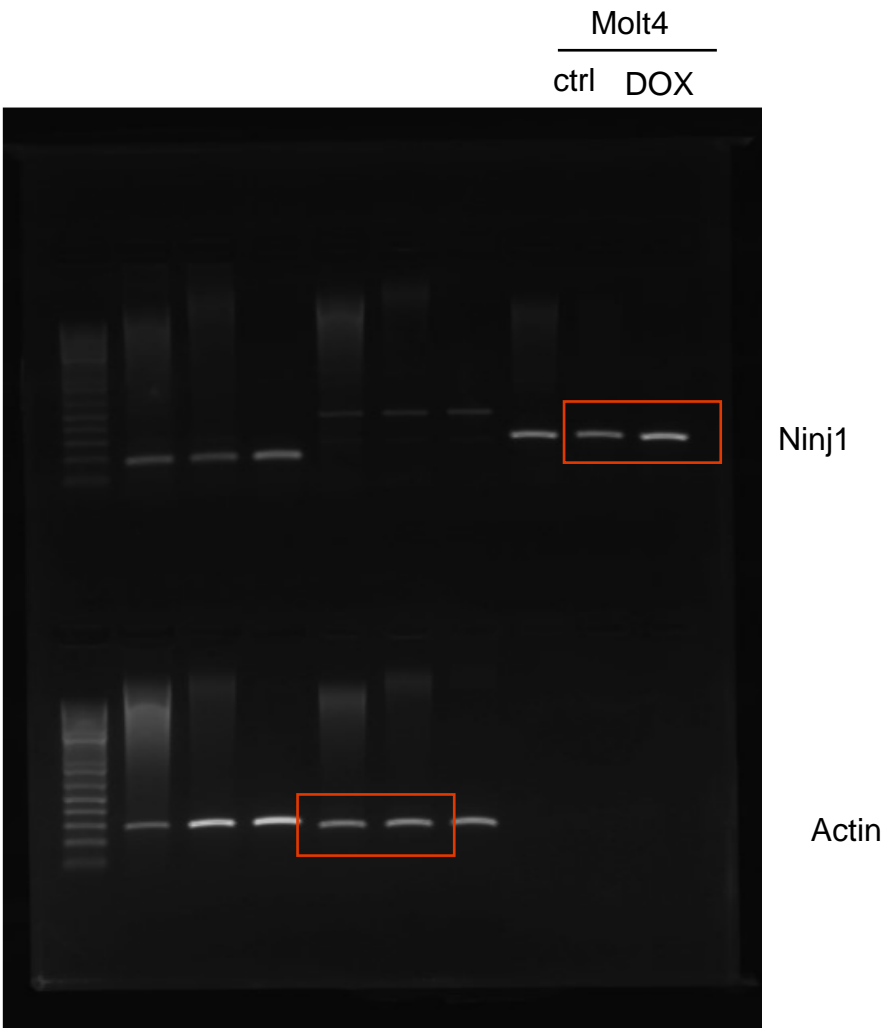

Fig. 1C

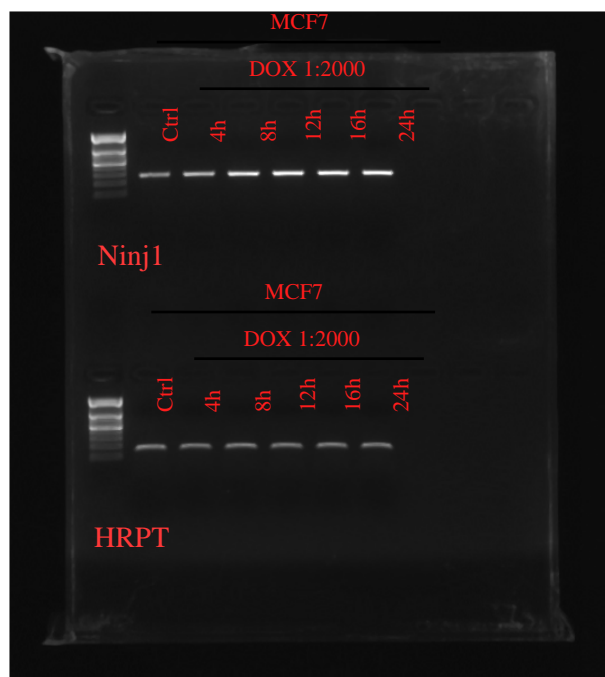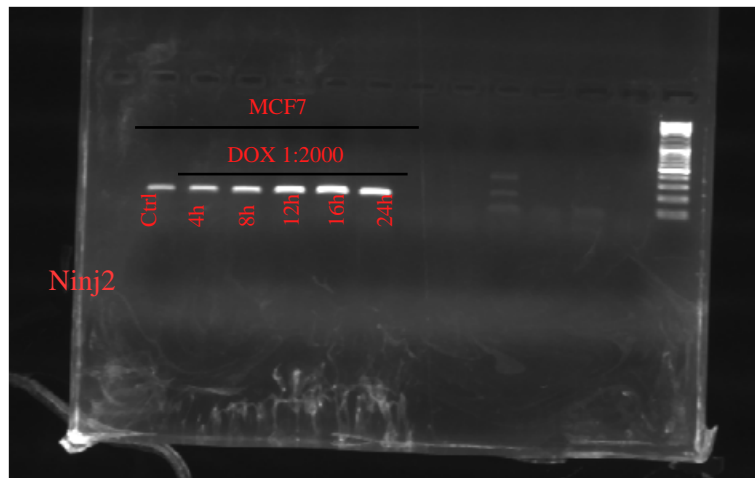

Fig. 1D

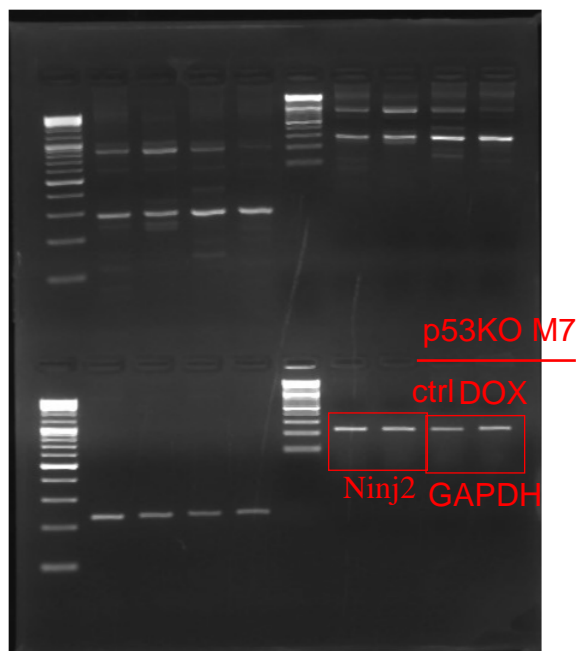

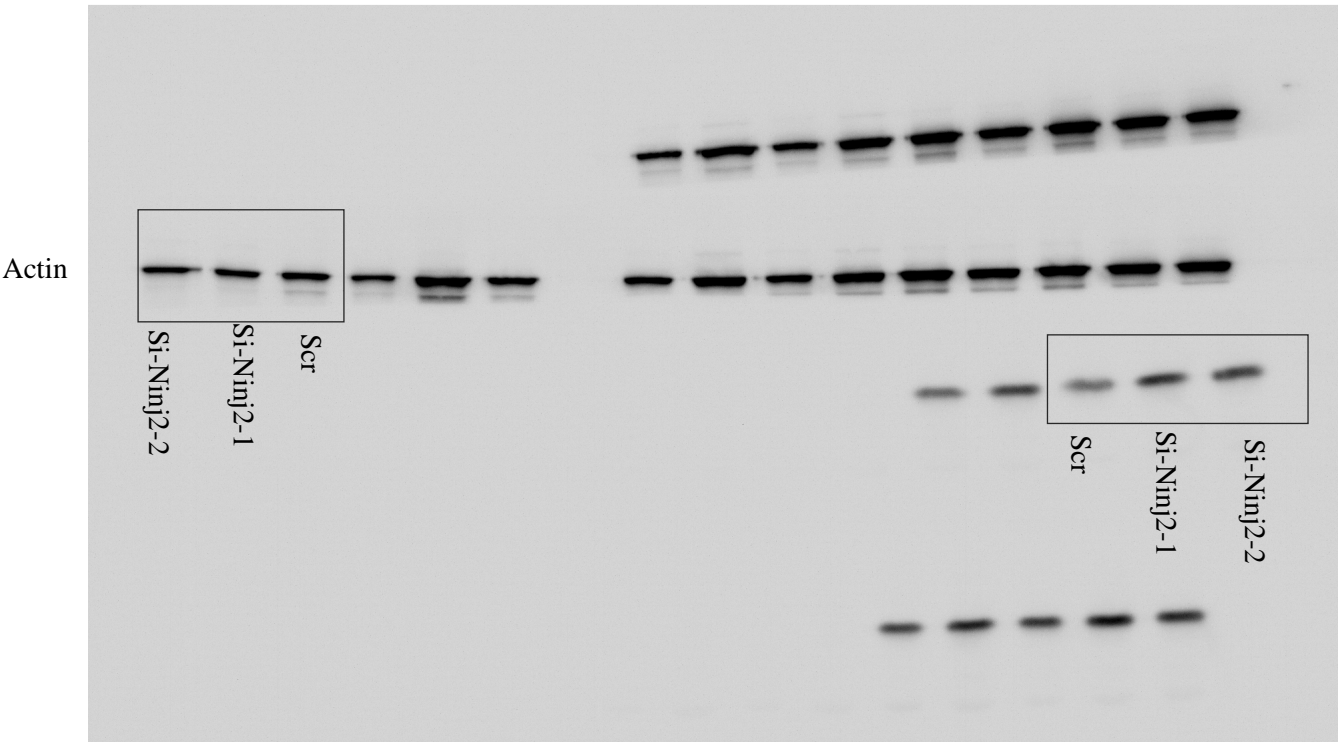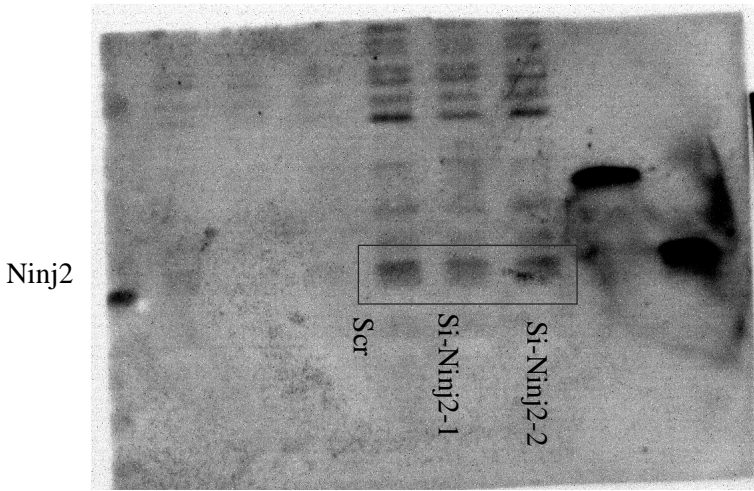

Fig. 1E

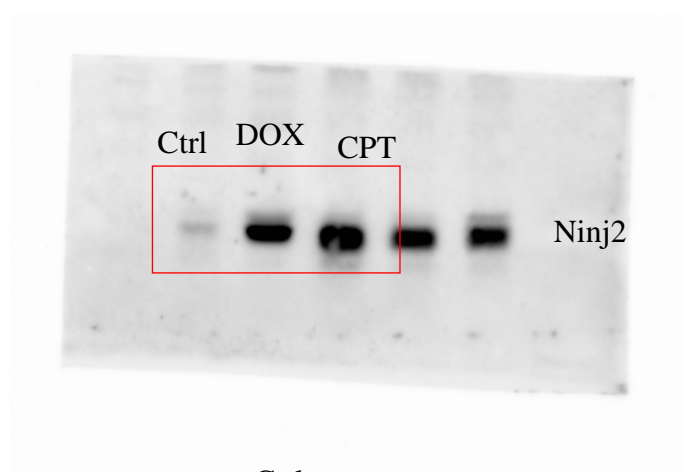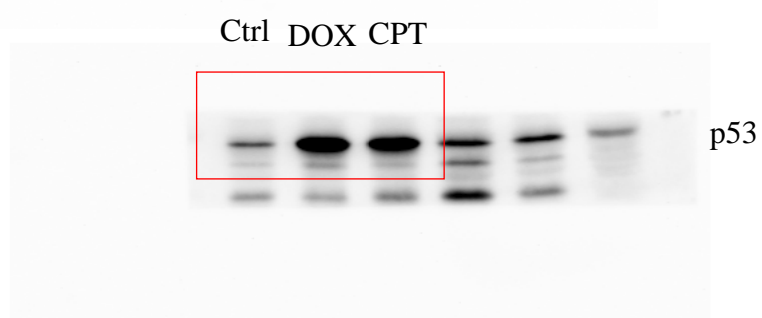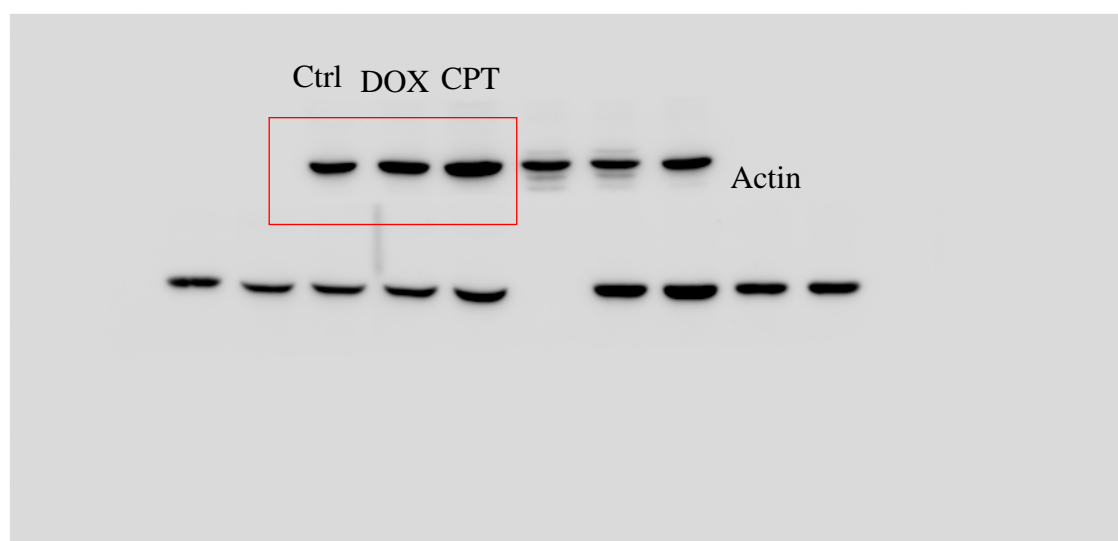

Fig. 1G

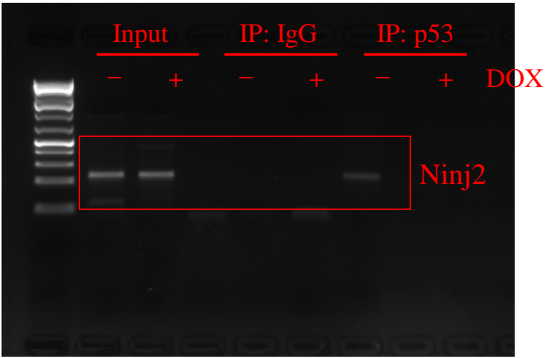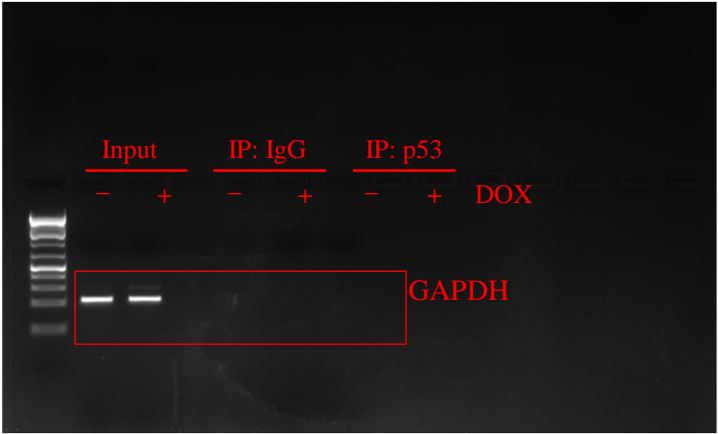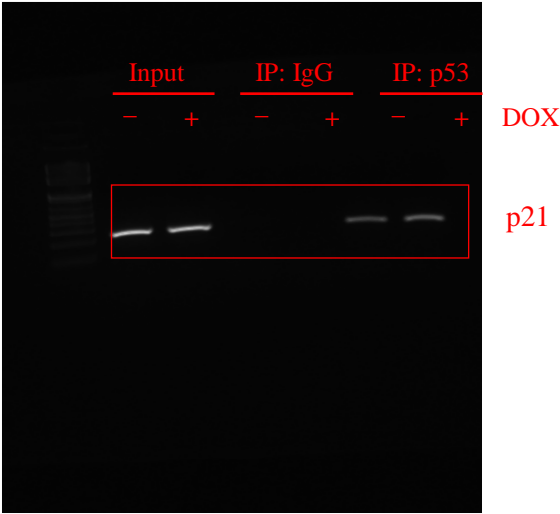

Fig. 2A

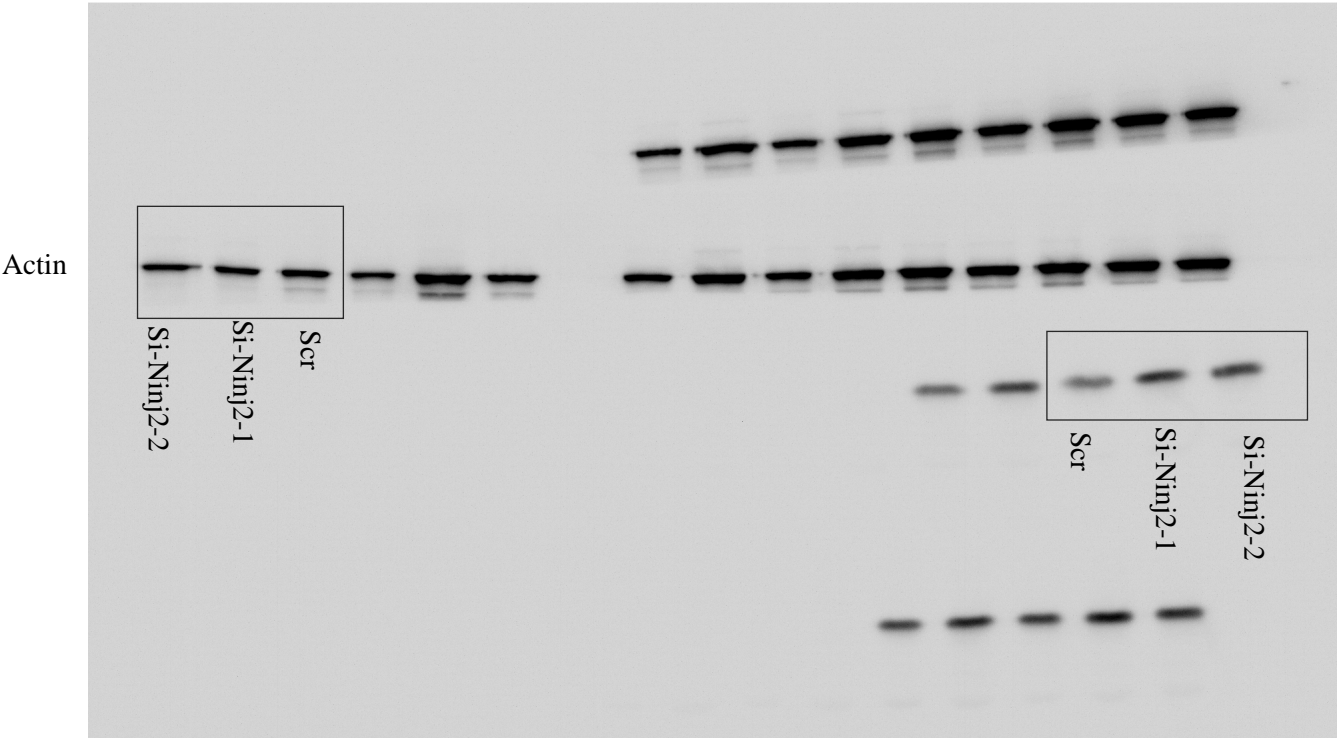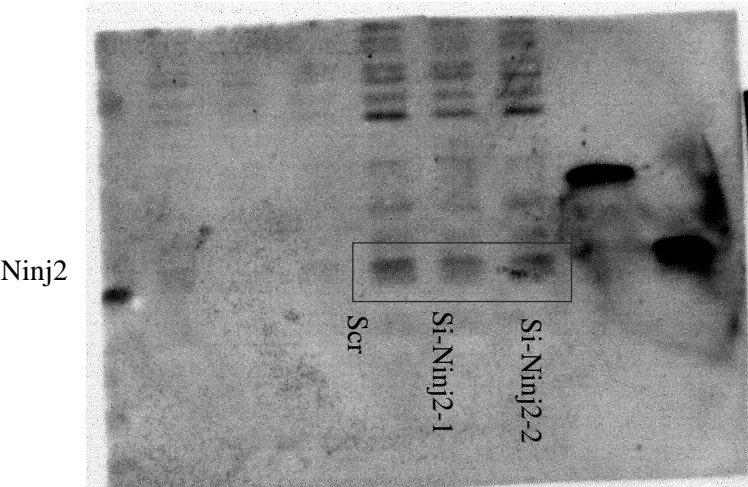

Fig. 2B

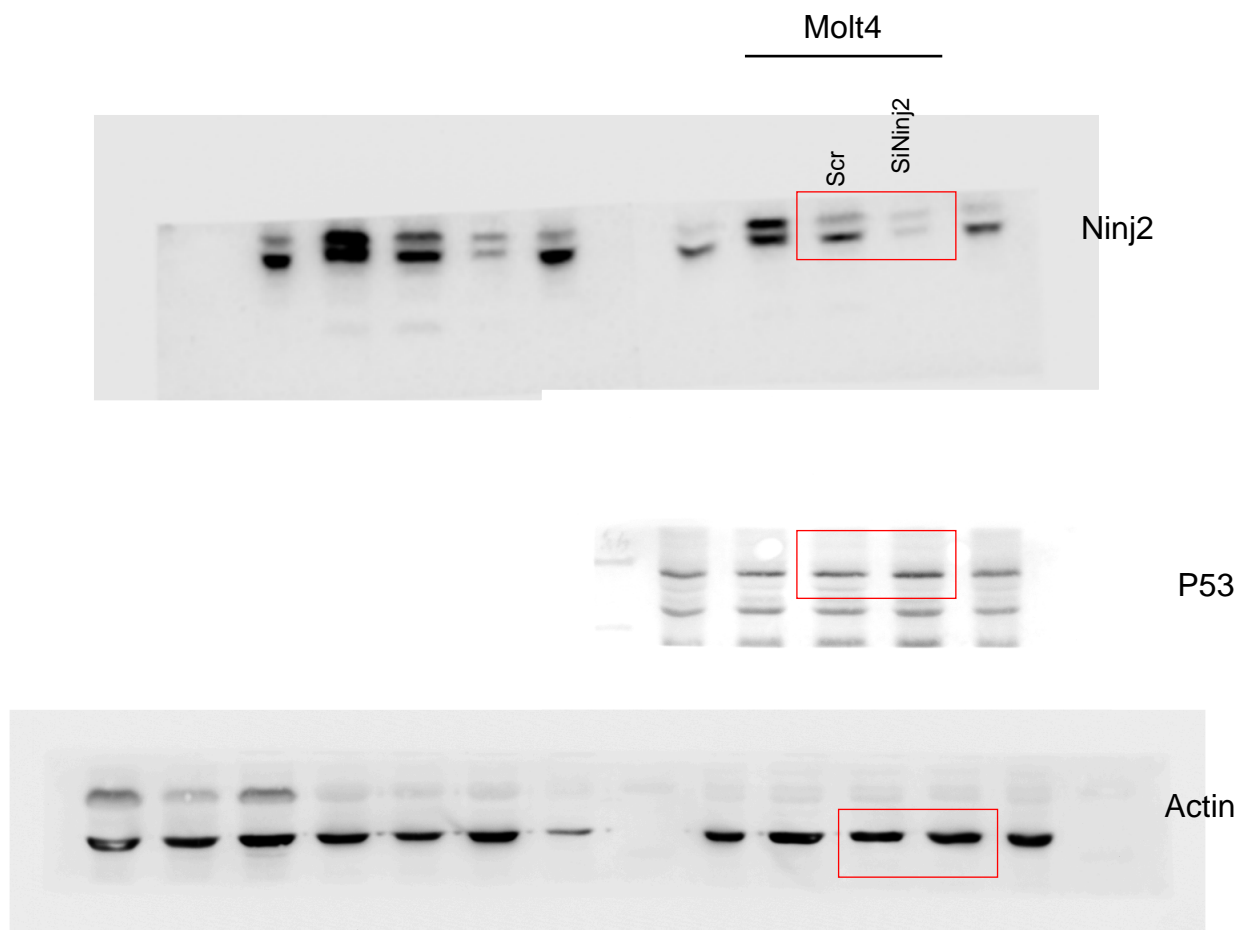

Fig2C

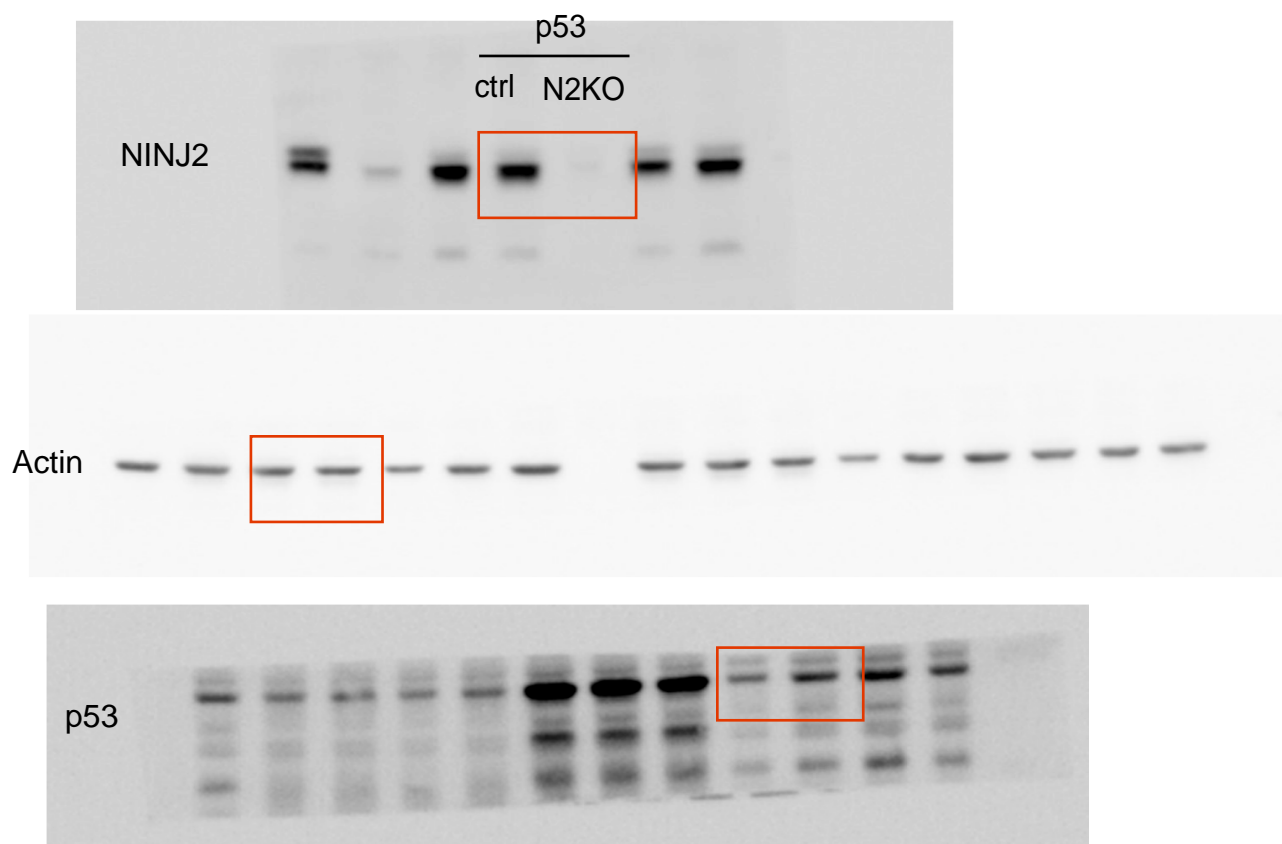



Fig. 2D

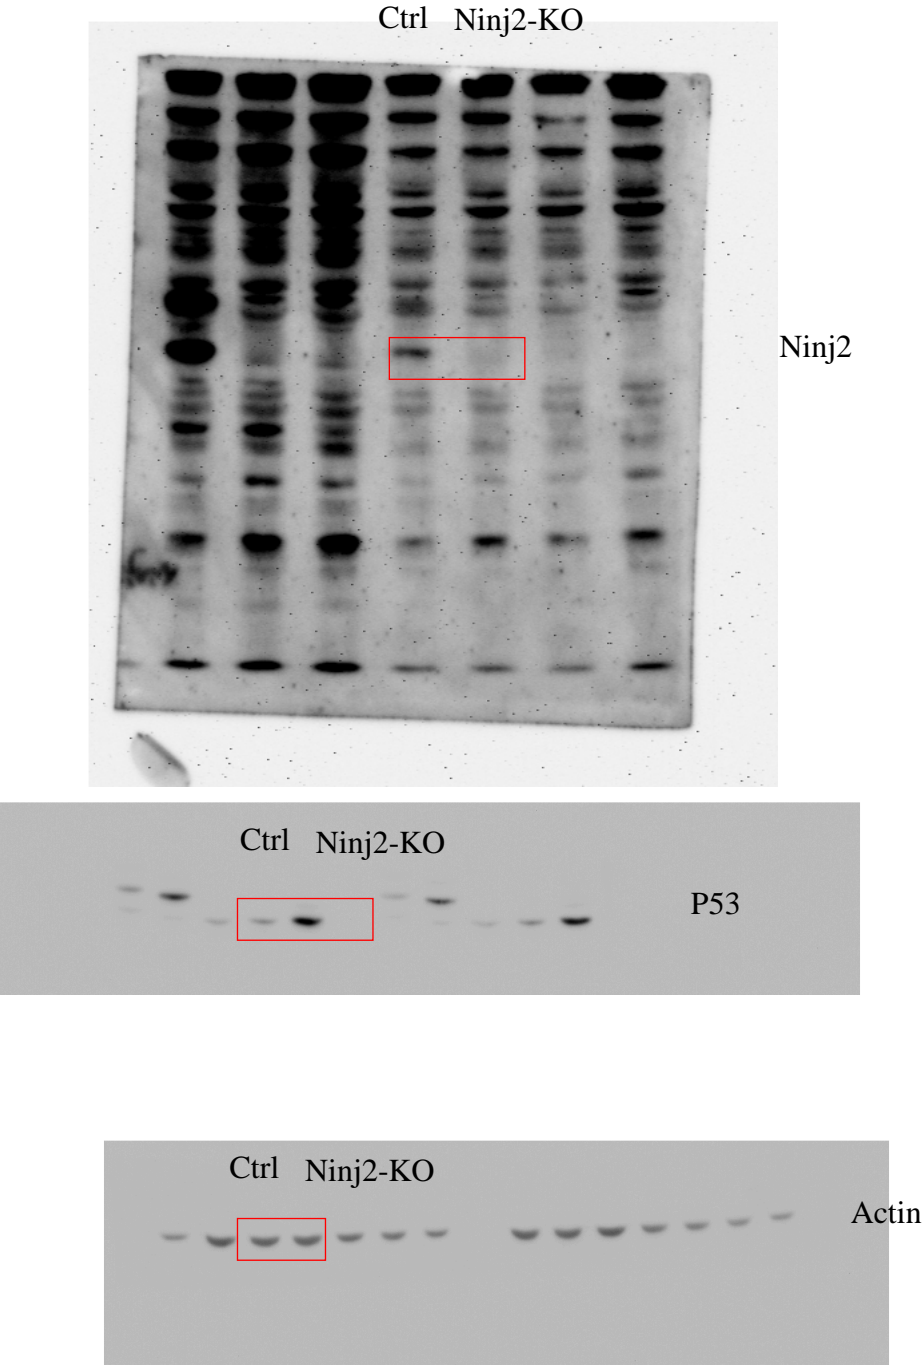

Fig2E

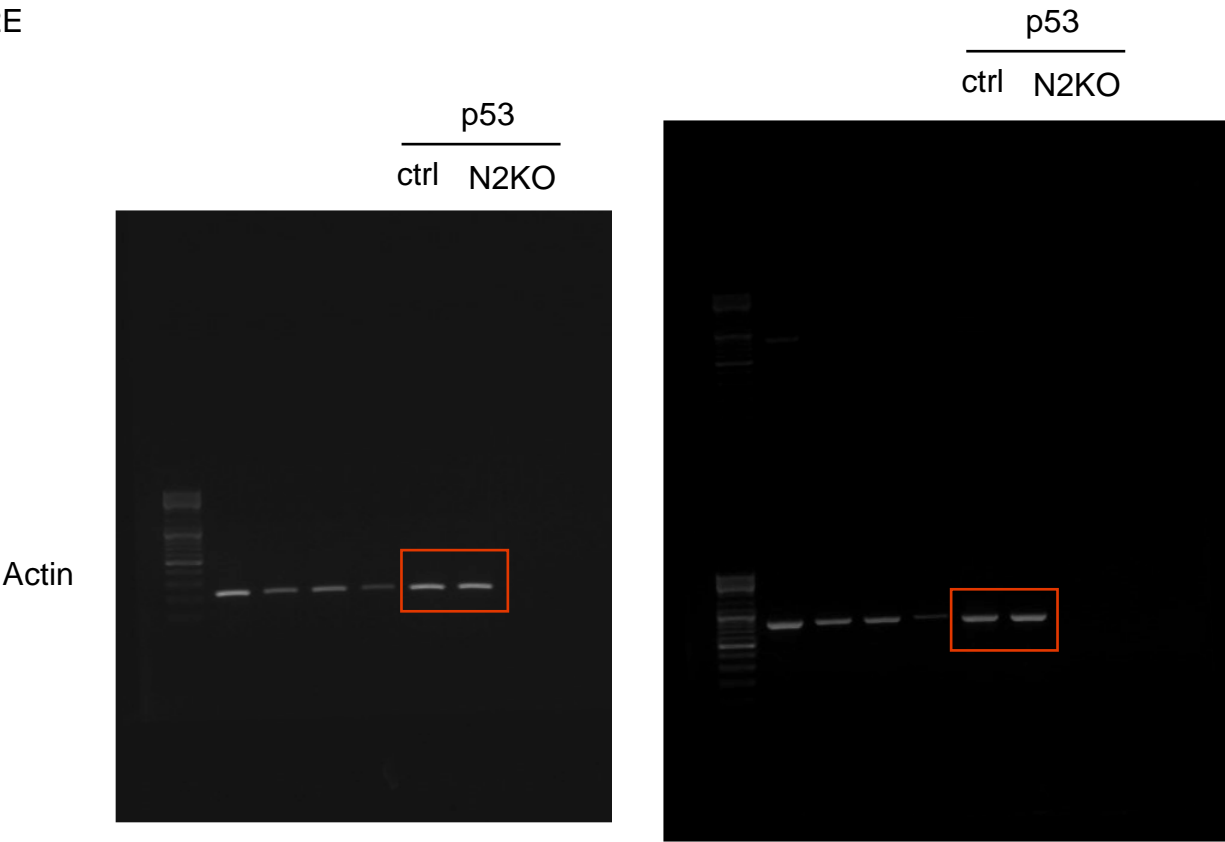

FIG. 2F

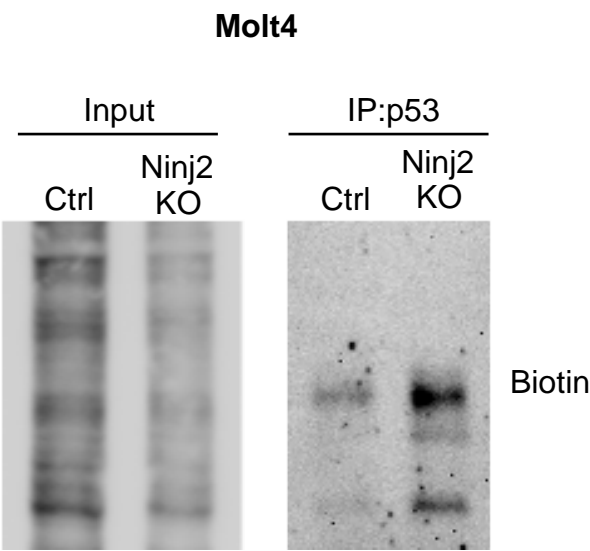

Fig. 3B

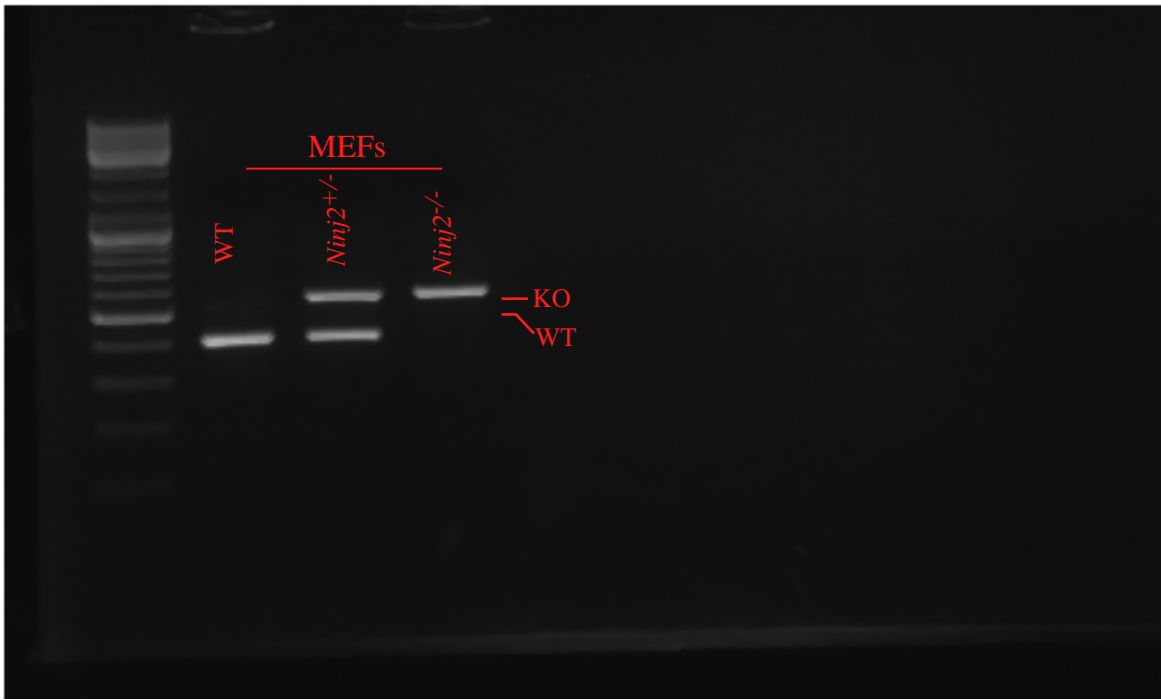

Fig. 3C

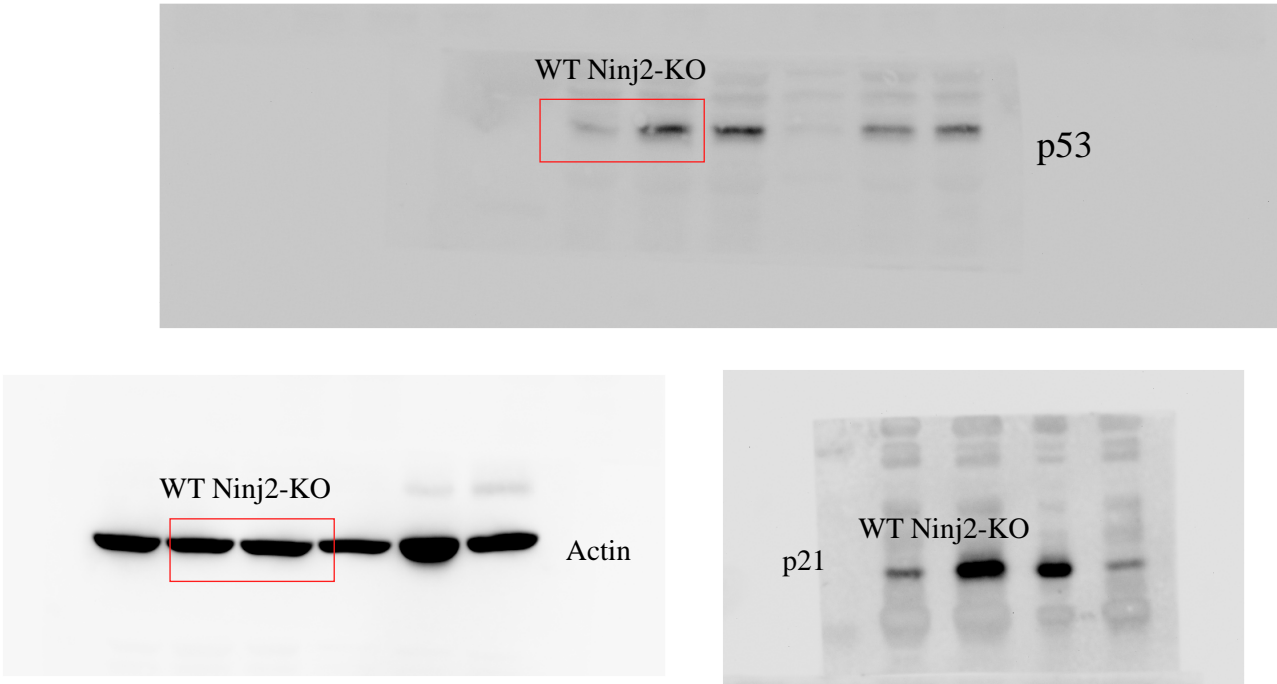

Figure 4D

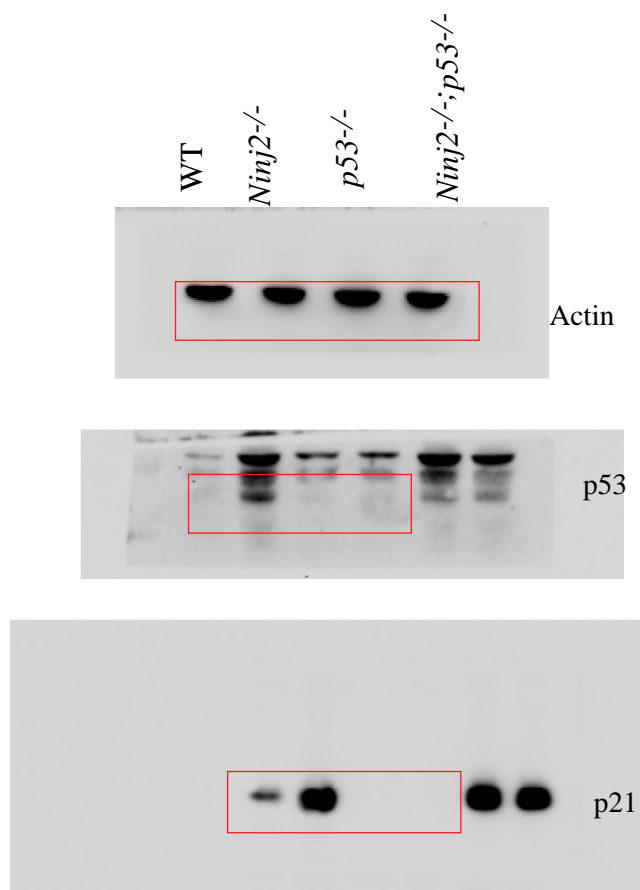

Fig. 5A

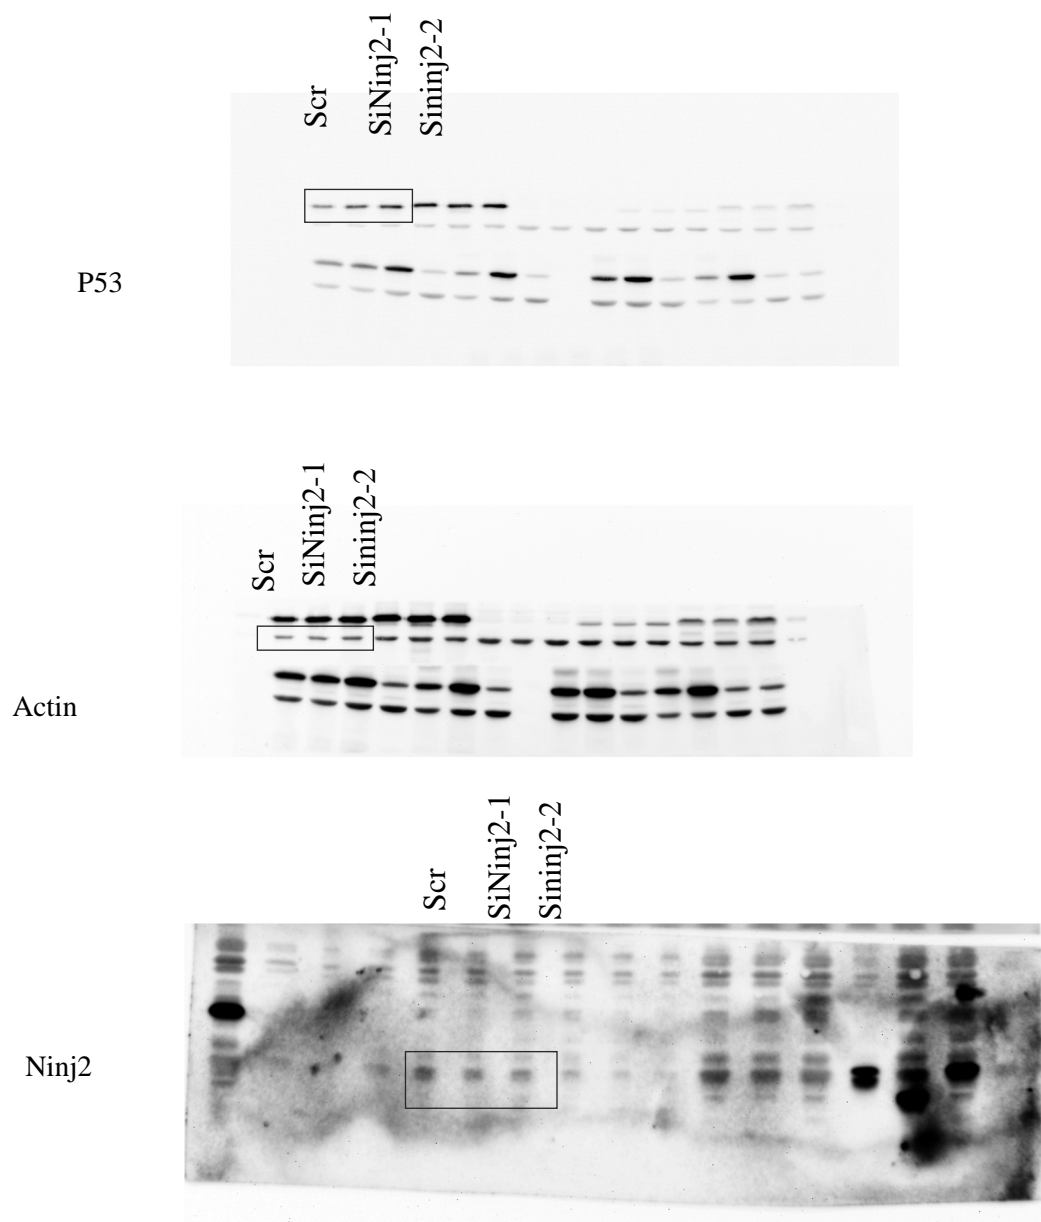

Fig 5B

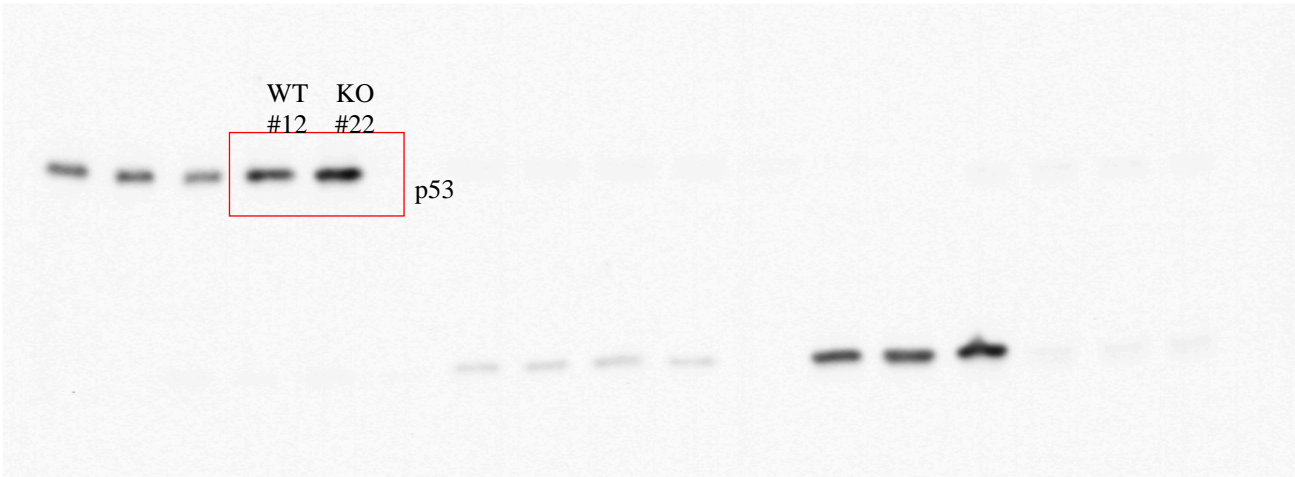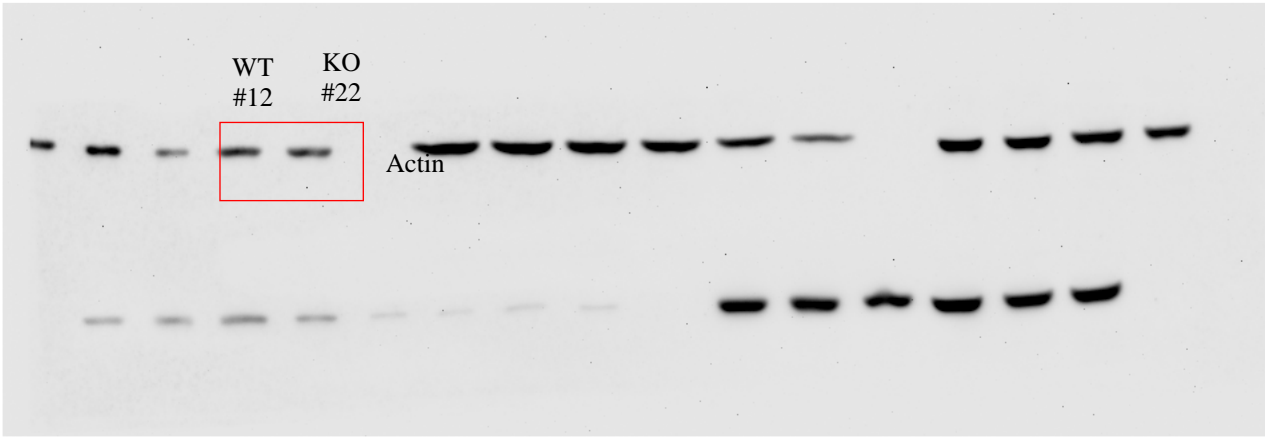

Supplement: s1 [file s1]
